# Supplementary material for: Exploring the Impact of Climatic Variables on Arecanut Fruit Rot Epidemic by Understanding the Disease Dynamics in Relation to Space and Time
Source: MDPI journal article supplement (doi:10.3390/jof8070745), 2022-07-19
Supplement: s1 [file s1]

2018

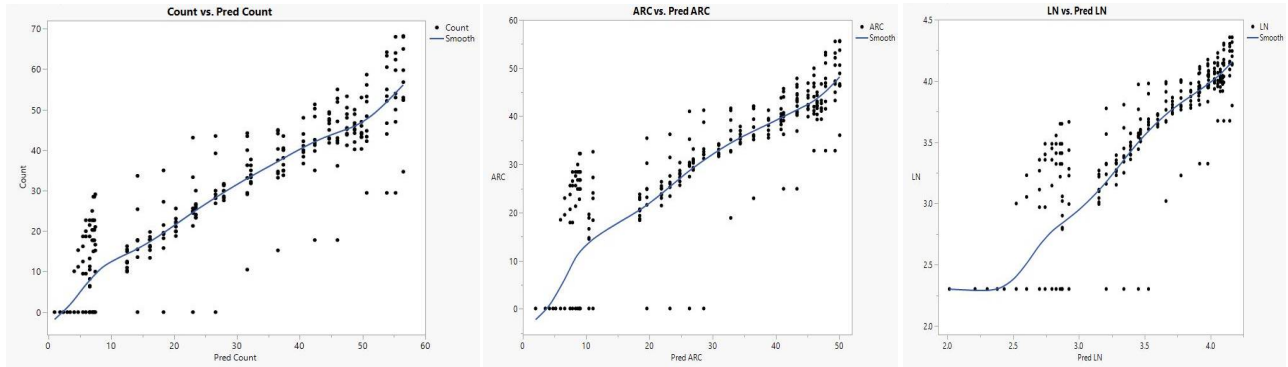

2019

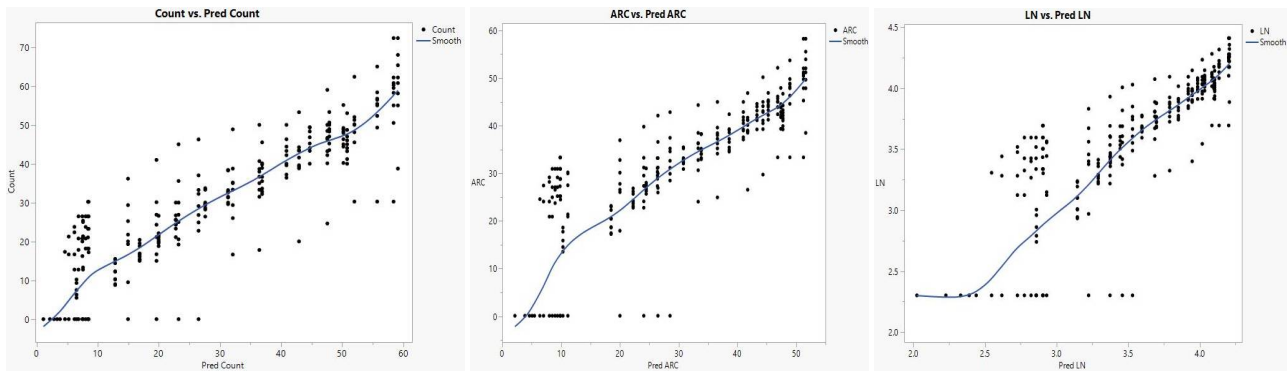

**Supplementary Figure S1.** Summary and estimates of generalized linear model (GLM) with negative binomial regression model with log link including different model parameters (count, ARC, and linear (LN)).

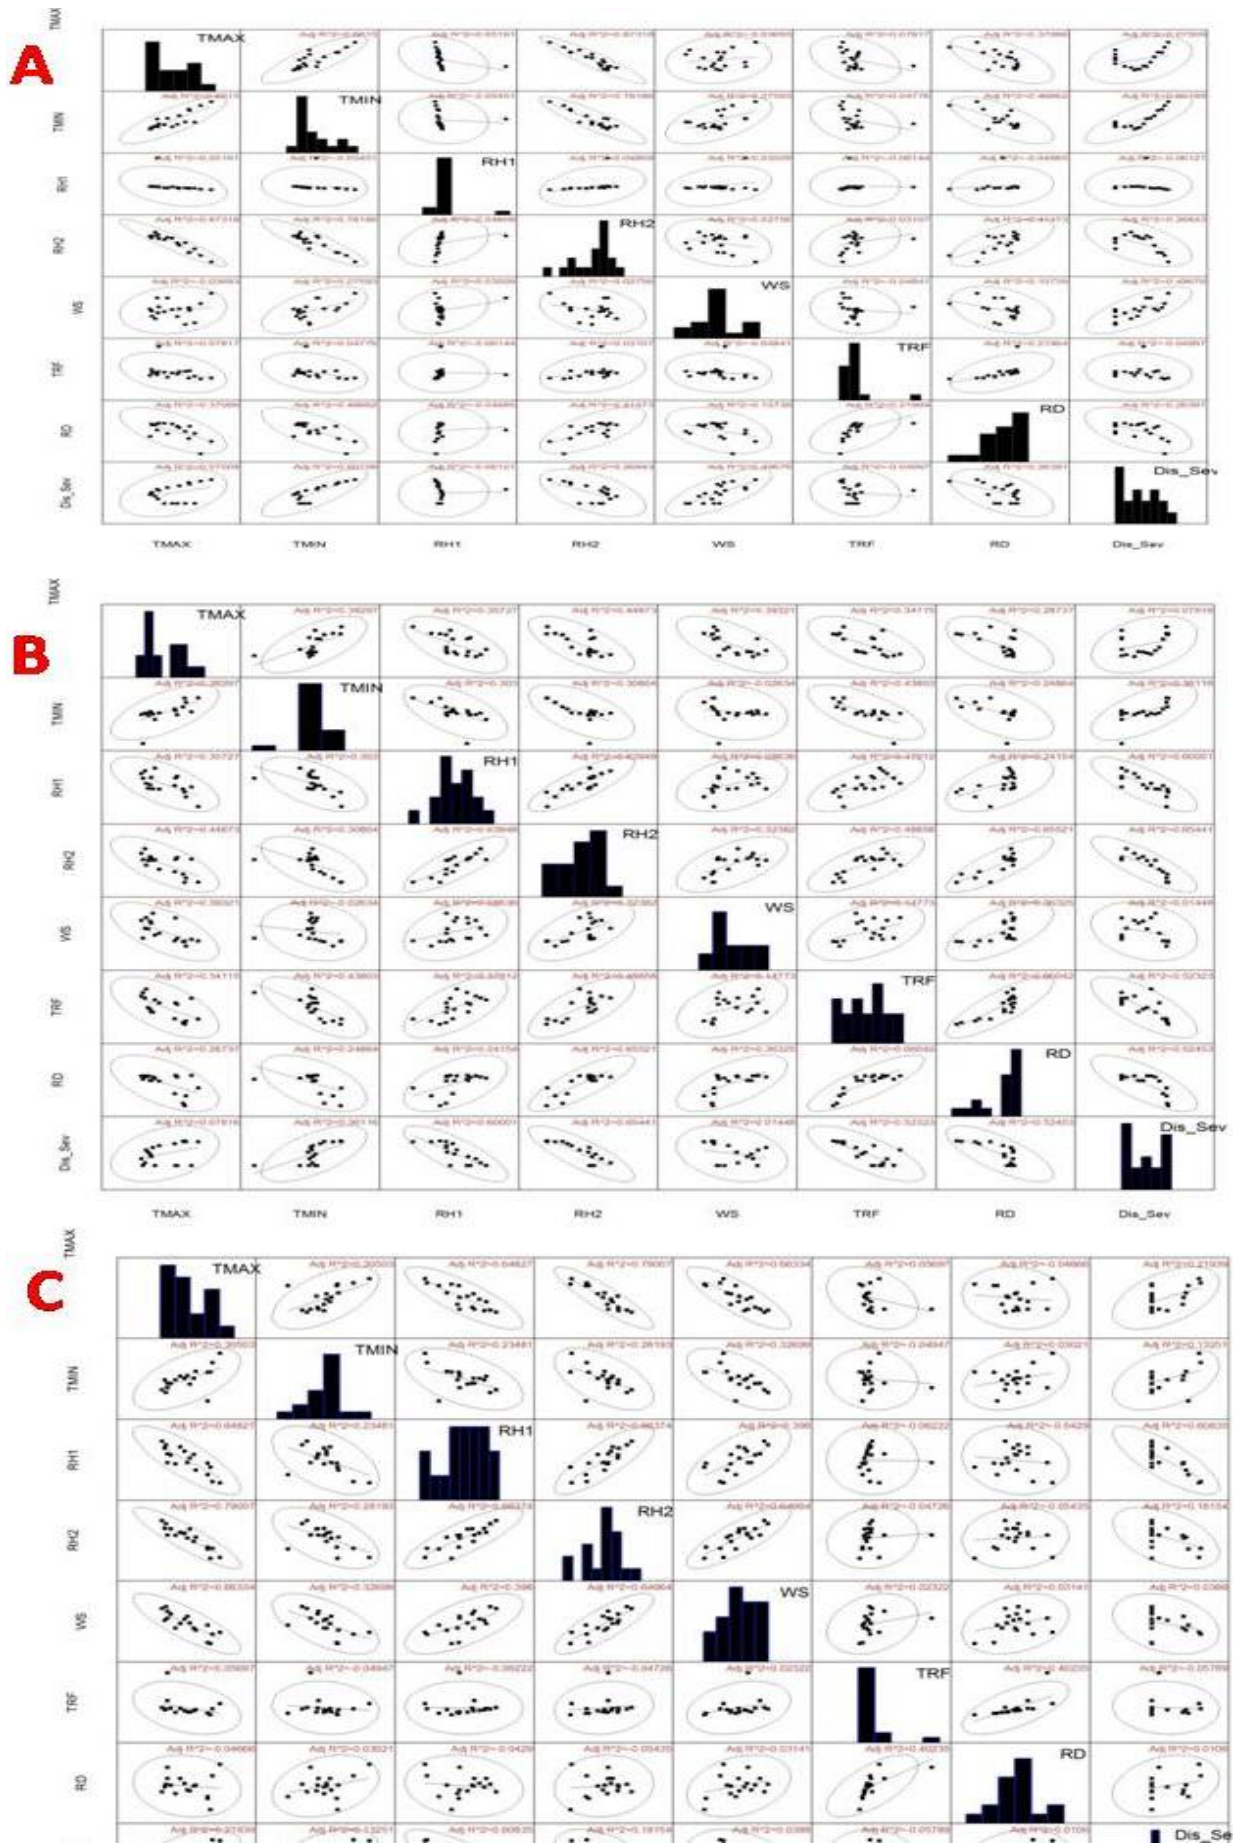

**Supplementary Figure S2.** Regression analysis on regional occurrence of FRD pitting climatic predictors in Malnad (A), Coastal (B), and Maidan (C) regions of Karnataka.
